# Supplementary material for: Using paired serology and surveillance data to quantify dengue transmission and control during a large outbreak in Fiji
Source: PubMed Central journal article supplement (PMC6092126; doi:10.7554/elife.34848), 2018-08-14
Supplement: elife-34848-supp1.pdf [file elife-34848-supp1.pdf]

## Supplementary File 1

| Health-seeking behaviour                             | Negative | % (95% CI)       | Positive | % (95% CI)        |
|------------------------------------------------------|----------|------------------|----------|-------------------|
| No fever in preceding two years                      | 77       | 79.4 (70-86.9)   | 26       | 68.4 (51.3-82.5)  |
| Fever in preceding two years without visiting doctor | 4        | 4.12 (1.13-10.2) | 2        | 5.26 (0.644-17.7) |
| Visited doctor with fever in preceding two years     | 16       | 16.5 (9.73-25.4) | 10       | 26.3 (13.4-43.1)  |
| Total                                                | 97       |                  | 38       |                   |

Supplementary File 1A: Relationship between seroconversion and health-seeking behaviour for participants who were initially seronegative by ELISA in 2013. Table shows breakdown for participants who were also negative in 2015 (i.e. did not seroconvert) and positive in 2015 (i.e. seroconverted).

| Assay | Year | DENV-1           | DENV-2           | DENV-3           | DENV-4           | Any DENV         |
|-------|------|------------------|------------------|------------------|------------------|------------------|
| ELISA | 2013 | -                | -                | -                | -                | 64% (49.2-77.1%) |
|       | 2015 | -                | -                | -                | -                | 92% (80.8-97.8%) |
| MIA   | 2013 | 64% (49.2-77.1%) | 16% (7.17-29.1%) | 38% (24.7-52.8%) | 34% (21.2-48.8%) | 72% (57.5-83.8%) |
|       | 2015 | 86% (73.3-94.2%) | 18% (8.58-31.4%) | 72% (57.5-83.8%) | 50% (35.5-64.5%) | 92% (80.8-97.8%) |
| NT    | 2013 | 64% (49.2-77.1%) | 44% (30-58.7%)   | 44% (30-58.7%)   | 30% (17.9-44.6%) | 74% (59.7-85.4%) |
|       | 2015 | 84% (70.9-92.8%) | 64% (49.2-77.1%) | 90% (78.2-96.7%) | 52% (37.4-66.3%) | 96% (86.3-99.5%) |

Supplementary File 1B: Proportion seropositive against each of the four DENV serotypes and any DENV (i.e. at least one serotype) for a subset of 50 individuals tested using ELISA, MIA and neutralisation assays.

| Parameter        | SEIR                    | SEIR + climate           | SEIR + climate + control |
|------------------|-------------------------|--------------------------|--------------------------|
| $1/\nu_h$        | 4.6 (2.9-6.7)           | 5.3 (4.1-6.8)            | 5.9 (4.6-7.5)            |
| $1/\gamma$       | 3.9 (2.8-5.3)           | 4.8 (3.6-6.1)            | 5.3 (3.9-6.9)            |
| $1/\hat{\nu}_v$  | 9.7 (8-12)              | 9.8 (7.9-12)             | 9.8 (8-12)               |
| $1/\hat{\delta}$ | 6.3 (3.7-9)             | 7.5 (6-9.2)              | 8.7 (6.8-11)             |
| $\hat{\alpha}$   | 0.2 (0.12-0.4)          | 0.16 (0.057-0.59)        | 0.43 (0.19-1)            |
| $\hat{m}$        | 16 (11-20)              | 5.4 (0.4-43)             | 0.69 (0.14-3.5)          |
| $\hat{K}$        | 2.4 (1.1-7.9)           | 10 (0.69-83)             | 34 (6.5-96)              |
| $a_1$            | 8.8 (1.7-120)           | 0.47 (0.054-350)         | 55 (6.2-450)             |
| $a_2$            | 0.18 (0.057-0.91)       | 0.15 (0.028-0.86)        | 0.58 (0.32-0.83)         |
| $a_\tau$         | 28 (0.038-28)           | 0.0021 (0.0013-27)       | 0.0017 (0.0013-0.0096)   |
| $r_{lab}$        | 0.074 (0.038-0.16)      | 0.11 (0.074-0.19)        | 0.13 (0.086-0.2)         |
| $r_{DLI}$        | 0.11 (0.045-0.25)       | 0.12 (0.073-0.25)        | 0.11 (0.073-0.19)        |
| $\rho$           | 1.4 (0.43-2.1)          | 0.87 (0.62-1.3)          | 0.57 (0.38-0.88)         |
| $I_{hc}^0$       | 10 (3.9-20)             | 1700 (130-4400)          | 140 (18-550)             |
| $I_{ha}^0$       | 2.9 (0.98-7.3)          | 0.32 (0.0077-64)         | 130 (19-680)             |
| $R_{hc}^0$       | 0.056 (0.029-0.097)     | 0.083 (0.04-0.15)        | 0.064 (0.027-0.12)       |
| $R_{ha}^0$       | 0.4 (0.32-0.47)         | 0.42 (0.36-0.49)         | 0.43 (0.36-0.49)         |
| $I_v^0$          | 0.0026 (0.00024-0.0069) | 0.00031 (1.6e-05-0.0059) | 1e-04 (1.2e-05-0.0015)   |

Supplementary File 1C: Posterior distributions for parameters in Table 7 using models fitted to surveillance data and MIA data.

| Parameter        | SEIR                  | SEIR + climate           | SEIR + climate + control |
|------------------|-----------------------|--------------------------|--------------------------|
| $1/\nu_h$        | 5 (3.5-6.9)           | 5.1 (3.9-6.7)            | 5.7 (4.4-7.2)            |
| $1/\gamma$       | 4 (2.7-5.8)           | 4.6 (3.4-5.8)            | 5 (3.7-6.3)              |
| $1/\hat{\nu}_v$  | 9.6 (7.7-12)          | 9.6 (7.9-12)             | 9.7 (7.9-12)             |
| $1/\hat{\delta}$ | 6.6 (4.5-9.1)         | 7 (5.7-8.9)              | 8 (6.4-10)               |
| $\hat{\alpha}$   | 0.25 (0.12-0.51)      | 0.24 (0.14-0.33)         | 0.42 (0.15-0.63)         |
| $\hat{m}$        | 26 (1.8-49)           | 7.2 (4.3-21)             | 1.7 (0.74-12)            |
| $\hat{K}$        | 0.096 (0.02-0.92)     | 2.4 (0.51-5.5)           | 11 (2.3-66)              |
| $a_1$            | 1.4 (0.021-890)       | 420 (110-980)            | 57 (12-890)              |
| $a_2$            | 0.023 (0.0011-0.68)   | 0.26 (0.12-0.66)         | 0.68 (0.38-0.93)         |
| $a_\tau$         | 28 (28-28)            | 0.0094 (0.0022-25)       | 0.0013 (0.0013-0.27)     |
| $r_{lab}$        | 0.11 (0.056-0.8)      | 0.081 (0.062-0.11)       | 0.14 (0.094-0.23)        |
| $r_{DLI}$        | 0.18 (0.066-1.4)      | 0.083 (0.059-0.11)       | 0.13 (0.087-0.2)         |
| $\rho$           | 1.2 (0.4-2.1)         | 0.37 (0.24-0.58)         | 0.31 (0.19-0.49)         |
| $I_{hc}^0$       | 16 (3.2-2700)         | 41 (16-250)              | 0.98 (0.21-3.8)          |
| $I_{ha}^0$       | 0.43 (0.015-2.8)      | 42 (7.8-110)             | 1.3 (0.0094-57)          |
| $R_{hc}^0$       | 0.21 (0.13-0.31)      | 0.19 (0.13-0.27)         | 0.21 (0.14-0.3)          |
| $R_{ha}^0$       | 0.74 (0.66-0.81)      | 0.73 (0.66-0.78)         | 0.75 (0.69-0.8)          |
| $I_v^0$          | 0.0019 (0.00012-0.02) | 0.00048 (0.00026-0.0012) | 0.00039 (0.00014-0.001)  |

Supplementary File 1D: Posterior distributions for parameters in Table 7 using models fitted to surveillance data and ELISA data.
