# Supplementary material for: Using paired serology and surveillance data to quantify dengue transmission and control during a large outbreak in Fiji
Source: PubMed Central journal article supplement (PMC6092126; doi:10.7554/elife.34848), 2018-08-14
Supplement: elife-34848-supp2.pdf [file elife-34848-supp2.pdf]

**Data collection form**

**Part A: Participant information**

(Selecting individuals both agreeing further sample testing and further contact)

Participant ID **FJD CP**

First name: \_\_\_\_\_ Family Name : \_\_\_\_\_ Age: \_\_\_\_\_

**Part B: Visit record sheet**

Date today: \_\_\_ / \_\_\_ / 20\_\_\_ (dd/mm/yyyy)

Interviewer: \_\_\_\_\_

Bula vinaka! Thank you for agreeing to take part in this research. We would like to ask you a few questions to help us understand dengue fever in Fiji. Please stop me and ask questions whenever you would like.

|                                                  |
|--------------------------------------------------|
| Have <b>you</b> had a fever in the last 2 years? |
| Circle: 1=yes 0=no, -1=don't know, -2=refused    |

|                                                                    |
|--------------------------------------------------------------------|
| Have <b>you</b> visited a doctor with a fever in the last 2 years? |
| Circle: 1=yes 0=no, -1=don't know, -2=refused                      |

| If YES to both                                                                          | Fever episode (or 1 <sup>st</sup> episode if more than one) | 2 <sup>nd</sup> episode (if more than one) | 3 <sup>rd</sup> episode (if more than two) |
|-----------------------------------------------------------------------------------------|-------------------------------------------------------------|--------------------------------------------|--------------------------------------------|
| When? Year (-1=don't know)                                                              |                                                             |                                            |                                            |
| Month, if known (-1=don't know)                                                         |                                                             |                                            |                                            |
| Did the doctor suspect it was dengue fever? 1=yes, 0=no, -1=don't know, -2=refused      |                                                             |                                            |                                            |
| Did the doctor do a blood test for dengue fever? 1=yes, 0=no, -1=don't know, -2=refused |                                                             |                                            |                                            |
| Was the blood test positive for dengue fever? 1=yes 0=no, -1=don't know, -2=refused     |                                                             |                                            |                                            |
| Were you hospitalised? 1=yes 0=no                                                       |                                                             |                                            |                                            |

|                                                                                      |          |          |          |
|--------------------------------------------------------------------------------------|----------|----------|----------|
| Have <b>any household members</b> visited a doctor with a fever in the last 2 years? |          |          |          |
| Circle: 1=yes 0=no, -1=don't know, -2=refused                                        |          |          |          |
|                                                                                      |          |          |          |
| If YES, give details of most recent episode (for up to 3 household members)          |          |          |          |
|                                                                                      | Member 1 | Member 2 | Member 3 |

|                                                                                         |  |  |  |
|-----------------------------------------------------------------------------------------|--|--|--|
| That person's age now                                                                   |  |  |  |
| When? Year (-1=don't know)                                                              |  |  |  |
| Month, if known (-1=don't know)                                                         |  |  |  |
| Did the doctor suspect it was dengue fever? 1=yes, 0=no, -1=don't know, -2=refused      |  |  |  |
| Did the doctor do a blood test for dengue fever? 1=yes, 0=no, -1=don't know, -2=refused |  |  |  |
| Was the blood test positive for dengue fever? 1=yes 0=no, -1=don't know, -2=refused     |  |  |  |
| Were they hospitalised? 1=yes 0=no 1=don't know, -2=refused                             |  |  |  |

Presence or absence at the house of:

| Item                                                    | Yes | No | Could not find out |
|---------------------------------------------------------|-----|----|--------------------|
| Mosquitoes                                              |     |    |                    |
| Used car tires                                          |     |    |                    |
| Open water containers (e.g. vase, bucket, oil drum)     |     |    |                    |
| Air conditioning                                        |     |    |                    |
| Blocked ditches/drains                                  |     |    |                    |
| Other mosquito breeding grounds<br>If yes, specify_____ |     |    |                    |

Check new telephone number if not previously recorded. Add new address GPS, if moved house. Check: is date of move recorded?

GPS coordinates of 1= front door of house, 2= community centroid,

South  $0^{\circ}\square\square^{\circ}\square\square.\square\square\square'$  (circle) East  $\square\square\square^{\circ}\square\square.\square\square\square'$

|                     |
|---------------------|
| Any other comments? |
|---------------------|

*Vinaka vaka levu.*
